# Supplementary material for: Thiol-Responsive Gold Nanodot Swarm with Glycol Chitosan for Photothermal Cancer Therapy
Source: MDPI journal article supplement (doi:10.3390/molecules26195980), 2021-10-02
Supplement: s1 [file s1]

# Thiol-responsive gold nanodot swarm with glycol chitosan for photothermal cancer therapy

SeongHoon Jo <sup>1,2,†</sup>, In-Cheol Sun <sup>1,†</sup>, Wan Su Yun <sup>3</sup>, Jinseong Kim <sup>3</sup>, Dong-Kwon Lim <sup>3</sup>, Cheol-Hee Ahn <sup>2,\*</sup>, and Kwangmeyung Kim <sup>1,3,\*</sup>

<sup>1</sup> Center for Theragnosis, Biomedical Research Institute, Korea Institute of Science and Technology, 5, Hwarang-ro, Seongbuk-gu, Seoul 02792, Korea; jsh@kist.re.kr (S.J.); pfesun@kist.re.kr (I.-C.S.)

<sup>2</sup> Research Institute of Advanced Materials (RIAM), Department of Materials Science and Engineering, Seoul National University, 1 Gwanak-ro, Gwanak-gu, Seoul 08826, Korea

<sup>3</sup> KU-KIST Graduate School of Converging Science and Technology, Korea University, 145 Anam-ro, Seongbuk-gu, Seoul 02841, Korea; ip9801@kist.re.kr (W.S.Y.); 218843@kist.re.kr (J.K.); dklm@korea.ac.kr (D.-K.L.)

\* Correspondence: chahn@snu.ac.kr (C.-H.A.); kim@kist.re.kr (K.K.)

† These authors contributed equally to this work.

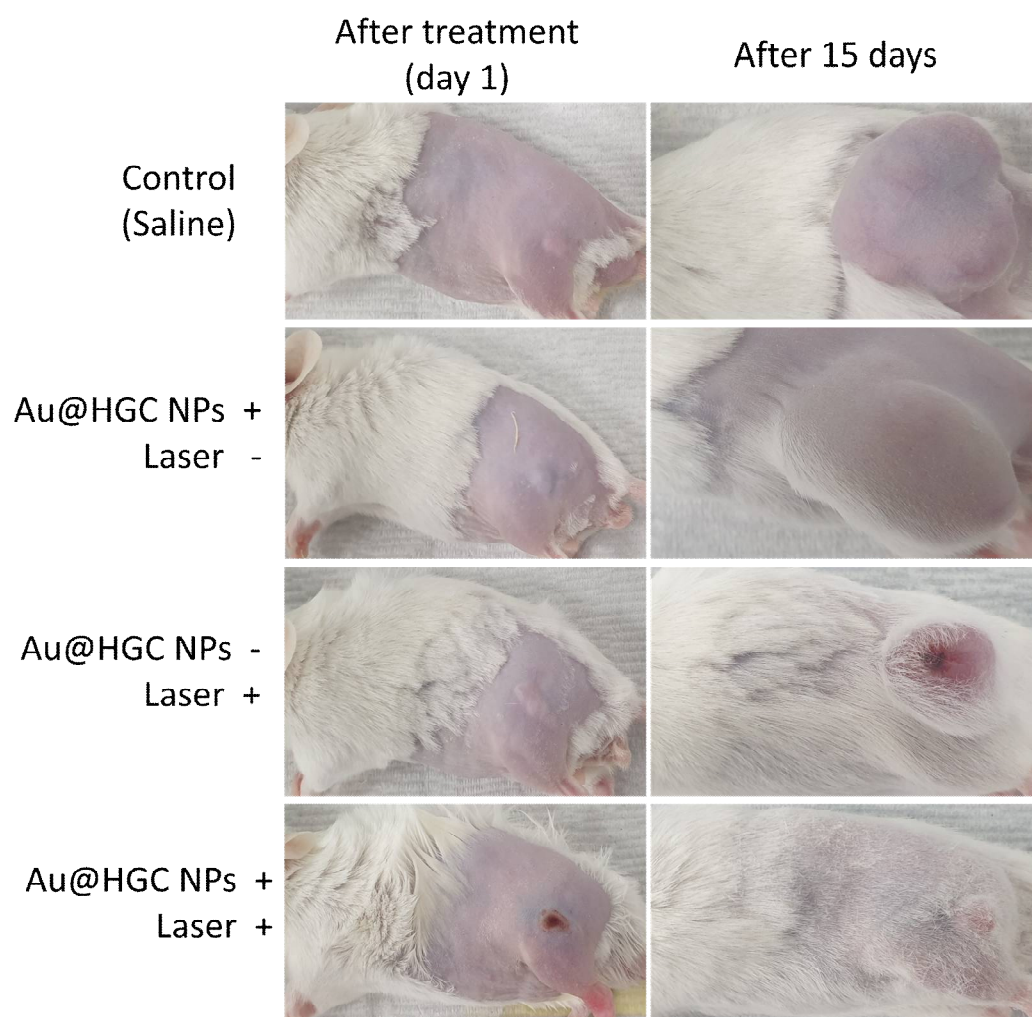

Figure S1. Representative Photographs of CT26-bearing mice after different treatments.

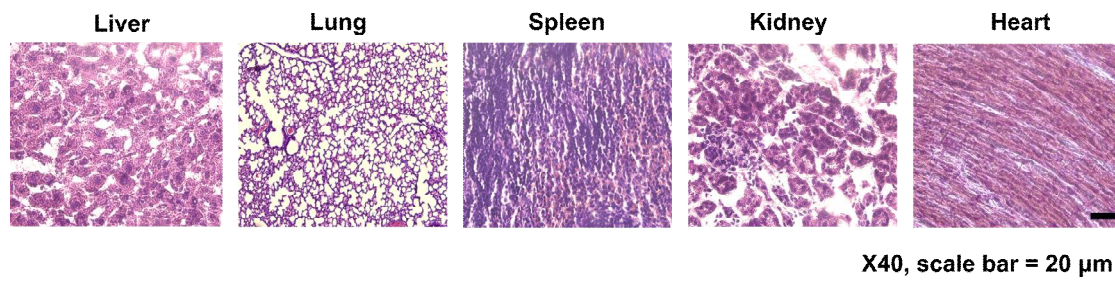

Figure S2. Histology of other organs on 14 days after injection of AuNSw.
